# Supplementary material for: Selective one- and two-electron reductions of a haloborane enabled by a π-withdrawing carbene ligand
Source: Royal Society of Chemistry journal article supplement (doi:10.1039/c8cc03433h), 2018-01-01
Supplement: c8cc03433h1.pdf [file c8cc03433h1.pdf]

**Supporting Information for:**

**Selective one- and two-electron reductions of a haloborane enabled by a  $\pi$ -withdrawing carbene ligand**

Dipak Kumar Roy,<sup>ab</sup> Ivo Krummenacher,<sup>ab</sup> Thomas Stennett<sup>ab</sup> Carsten Lenczyk,<sup>ab</sup>  
Torsten Thiess,<sup>ab</sup> Eileen Welz,<sup>c</sup> Bernd Engels<sup>c</sup> and Holger Braunschweig,<sup>\*ab</sup>

<sup>a</sup> *Institut für Anorganische Chemie, Julius-Maximilians-Universität Würzburg, Am Hubland, 97074 Würzburg, Germany.*

<sup>b</sup> *Institute for Sustainable Chemistry & Catalysis with Boron, Julius-Maximilians-Universität Würzburg, Am Hubland, 97074 Würzburg, Germany.*

<sup>c</sup> *Institute for Physical and Theoretical Chemistry, Julius-Maximilians- Universität Würzburg, Am Hubland, 97074 Würzburg, Germany.*

## Experimental Details

### General information

All reactions were performed under an atmosphere of dry argon using standard Schlenk line or glovebox techniques. Deuterated benzene and tetrahydrofuran were degassed by three freeze-pump-thaw cycles and dried over molecular sieves. All other solvents were distilled and degassed from appropriate drying agents. Solvents (both deuterated and non-deuterated) were stored under argon over activated 4 Å molecular sieves. NMR spectra were obtained from a Bruker Avance 500 NMR spectrometer ( $^1\text{H}$  and  $^1\text{H}\{^{11}\text{B}\}$ : 500.1 MHz,  $^{13}\text{C}\{^1\text{H}\}$ : 125.8 MHz) or a Bruker Avance 400 ( $^1\text{H}$  and  $^1\text{H}\{^{11}\text{B}\}$ : 400.1 MHz,  $^{13}\text{C}\{^1\text{H}\}$ : 100.6 MHz;  $^{11}\text{B}$ : 128.4 MHz,  $^{19}\text{F}$ : 376.5 MHz) at 298 K. Chemical shifts ( $\delta$ ) are given in ppm and internally referenced to the carbon nuclei ( $^{13}\text{C}\{^1\text{H}\}$ ) or residual protons ( $^1\text{H}$ ) of the solvent.  $^{11}\text{B}$  and  $^{19}\text{F}\{^1\text{H}\}$  NMR spectra were referenced to external standard  $[\text{BF}_3\cdot\text{OEt}_2]$  or  $\text{CFCl}_3$ , respectively. High-resolution mass spectrometry was obtained from a Thermo Scientific Exactive Plus spectrometer in LIFDI or ESI mode. EPR measurements at X-band (9.38 GHz) were carried out at room temperature using a Bruker ELEXSYS E580 CW EPR spectrometer. The continuous wave (CW) EPR spectrum was measured using 0.5 mW microwave power and 0.5 G field modulation at 100 kHz, with a conversion time of 80 ms. The spectral simulations were performed using MATLAB 8.6 and the EasySpin 5.2.11 toolbox.<sup>1</sup> Cyclic voltammetry experiments were performed using a Gamry Instruments Reference 600 potentiostat. A standard three-electrode cell configuration was employed using a platinum disk working electrode, a platinum wire counter electrode, and a silver wire, separated by a Vycor tip, serving as the reference electrode. Formal redox potentials are referenced to the ferrocene/ferrocenium ( $[\text{Cp}_2\text{Fe}]^{+/0}$ ) redox couple by using ferrocene as an internal standard. Tetra-*n*-butylammonium hexafluorophosphate ( $[n\text{-Bu}_4\text{N}][\text{PF}_6]$ ) was employed as the supporting electrolyte. Compensation for resistive losses (iR drop) was employed for all measurements. Pentafluorophenylboron dibromide<sup>2</sup> ( $\text{C}_6\text{F}_5\text{BBr}_2$ ), CAAC<sup>3</sup> and DAC-carbene<sup>4</sup> were synthesized according to the literature procedures.

## Preparation of [(CAAC)B(C<sub>6</sub>F<sub>5</sub>)Br<sub>2</sub>] (1)

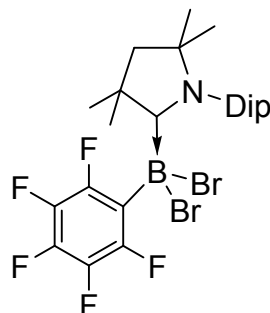

Hexane solution of CAAC (1.95 g, 6.81 mmol) was slowly added by cannula to a solution of C<sub>6</sub>F<sub>5</sub>BBR<sub>2</sub> (2.06 g, 6.78 mmol) in hexane at 30 °C with vigorous stirring. The reaction mixture was then allowed to warm to room temperature and stirred for three hours. A white precipitate was subsequently formed. After removal of all volatiles the residual solid was washed twice with pentane to yield the adduct **1** as a white powder (3.36 g, 85% yield). Colorless single crystals suitable for X-ray crystallography were obtained from a saturated benzene solution.

<sup>1</sup>H{<sup>11</sup>B} NMR (500.1 MHz, C<sub>6</sub>D<sub>6</sub>): δ 7.11 (t, *J* = 7.8 Hz, 1H, Dip(Ar)), 7.01 (d, *J* = 7.7 Hz, 2H, Dip(Ar)), 2.92 (sept, *J* = 6.6 Hz, 2H, Dip(CH(Me)<sub>2</sub>)), 1.53 (s, 2H, CAAC(CH<sub>2</sub>)), 1.51 (d, *J* = 6.5 Hz, 6H, Dip(CHMe<sub>2</sub>)), 1.45 (br, 6H, CAAC(BCCMe<sub>2</sub>)), 1.13 (d, *J* = 6.5 Hz, 6H, Dip(CHMe<sub>2</sub>)), 0.95 (s, 6H, CAAC (DipNC(Me)<sub>2</sub>)).

<sup>13</sup>C{<sup>1</sup>H} NMR (101 MHz, C<sub>6</sub>D<sub>6</sub>): δ 215.1 (br, *C* carbene), 145.9 (br, Dip(C<sup>Ar</sup>)), 141.0 (br, C<sup>C6F5</sup>), 132.9 (C<sup>Ar(i-Pr)2</sup>), 129.9 (C<sup>ArH</sup>), 125.4 (Dip(C<sup>ArH</sup>)), 79.9 (DipNC(Me)<sub>2</sub>), 54.4 (BCC(Me)<sub>2</sub>), 51.4 (NC(Me)<sub>2</sub>CH<sub>2</sub>), 29.1 (d, *J* = 3.6 Hz), 28.3 (DipNC(Me)<sub>2</sub>), 26.7 (BCC(Me)<sub>2</sub>), 24.7 (Dip(CH(Me)<sub>2</sub>)).

<sup>19</sup>F{<sup>1</sup>H} NMR (376.5 MHz, C<sub>6</sub>D<sub>6</sub>): δ -126.7 (d, *J* = 18.9 Hz, 2F), -161.4 (t, *J* = 20.5 Hz, 1F), -166.3 (br, 2F).

<sup>11</sup>B NMR (128.4 MHz, C<sub>6</sub>D<sub>6</sub>): δ = -10.4 (s).

HRMS (LIFDI): calculated for C<sub>26</sub>H<sub>31</sub>BBrF<sub>5</sub>N ([M-Br]<sup>+</sup>): 542.1648; found: 542.1656.

## Preparation of [(DAC)B(C<sub>6</sub>F<sub>5</sub>)Br<sub>2</sub>] (**2**)

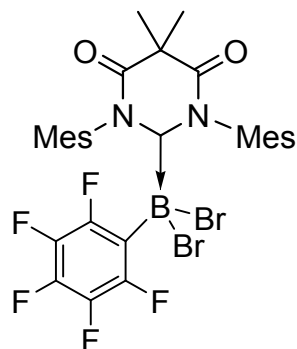

A benzene solution of DAC (2.0 g, 5.31 mmol) was slowly added by cannula to a solution of C<sub>6</sub>F<sub>5</sub>BBr<sub>2</sub> (1.82 g, 5.41 mmol) in hexane at 30 °C with vigorous stirring. The reaction mixture was then allowed to warm to room temperature and stirred for three hours. A light yellow precipitate was subsequently formed. After removal of all volatiles the residual solid was washed twice with pentane to yield the adduct **2** as a yellow powder (3.52 g, 92% yield). Single crystals suitable for X-ray crystallography were obtained from a saturated benzene solution.

<sup>1</sup>H{<sup>11</sup>B} NMR (500.1 MHz, C<sub>6</sub>D<sub>6</sub>): δ 6.50 (br, 4H, (ArH)), 2.22 (br s, 12H, Mes(Me<sub>4</sub>)), 1.97 (br s, 6H, Mes(Me<sub>2</sub>)), 1.36 (s, 6H, DAC(Me<sub>2</sub>)).

<sup>13</sup>C{<sup>1</sup>H} NMR (101 MHz, C<sub>6</sub>D<sub>6</sub>): δ 195.6 (C, carbene) 171.3 (MesNCO), 147.2 (C<sup>C<sub>6</sub>F<sub>5</sub></sup>), 145.2 (C<sup>C<sub>6</sub>F<sub>5</sub></sup>), 140.3 (C<sup>ArMe</sup>), 136.3 (C<sup>ArH</sup>), 129.4 (C<sup>ArMe</sup>), 128.2 (C<sup>ArH</sup>), 51.7 (NC(O)C(Me)<sub>2</sub>), 22.2 (NC(O)C(Me)<sub>2</sub>), 19.1 (d, J = 3.9 Hz).

<sup>19</sup>F{<sup>1</sup>H} NMR (376.5 MHz, C<sub>6</sub>D<sub>6</sub>): δ -124.7 (dd, J = 17.3 Hz, 6.6 Hz, 2F), -160.2 (t, J = 20.4 Hz, 1F), -164.7 (m, 2F).

<sup>11</sup>B NMR (128.4 MHz, C<sub>6</sub>D<sub>6</sub>): δ = -9.3 (br).

HRMS (LIFDI): calculated for C<sub>30</sub>H<sub>28</sub>BBrF<sub>5</sub>N<sub>2</sub>O<sub>2</sub> ([M-Br]<sup>+</sup>): 633.1349; found: 633.1342.

### Preparation of the C-H activation product **3**

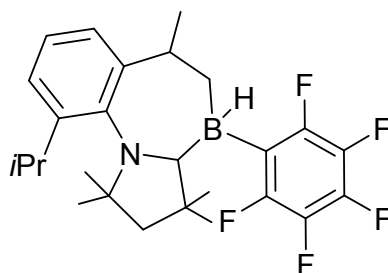

Benzene was slowly added to a mixture of **1** (100 mg, 0.16 mmol) and  $\text{KC}_8$  (47.8 mg, 0.35 mmol) by cannula with stirring. The reaction mixture was then allowed to stir at room temperature for four hours. The excess graphite was filtered off and all the volatiles of the filtrate were removed under vacuum, resulting in an off-white solid. The residual solid was washed twice with pentane to yield **3** as a white powder (58 mg, 70% yield). Colorless single crystals suitable for X-ray crystallography were obtained from a saturated benzene solution.

$^1\text{H}\{^{11}\text{B}\}$  NMR (500.1 MHz,  $\text{C}_6\text{D}_6$ ):  $\delta$  = 7.12-7.08 (m, 3H, Dip(Ar)), 2.79 (sept,  $J$  = 6.7 Hz, 1H, Dip( $\text{CHMe}_2$ )), 2.46 (m,  $\text{BCH}_2\text{CHMe}$ ), 2.25 (br, 1H, BH), 2.12 (m, 1H,  $\text{BCH}_2\text{CHMe}$ ), 1.43 (d,  $J$  = 6.8 Hz, 3H, Dip( $\text{CHMe}_2$ )), 1.35 (s, 1H, CAAC( $\text{CH}_2$ )), 1.31 (s, 1H, CAAC( $\text{CH}_2$ )), 1.23 (d,  $J$  = 6.9 Hz, 3H, Dip( $\text{CHMe}_2$ )), 1.19 (s, 6H, CAAC(DipNC( $\text{Me}$ ) $_2$ )), 0.99 (s, 3H,  $\text{BCH}_2\text{CHMe}$ ), 0.83 (s, 3H, CAAC(DipNC( $\text{Me}$ ) $_2$ )), 0.79 (s, 3H, CAAC(DipNC( $\text{Me}$ ) $_2$ )).

$^{13}\text{C}\{^1\text{H}\}$  NMR (101 MHz,  $\text{C}_6\text{D}_6$ ):  $\delta$  148.1 (br,  $\text{C}^{\text{C}_6\text{F}_5}$ ), 143.2 ( $\text{C}^{\text{Ar}}$ ), 142.6 ( $\text{C}^{\text{Ar}(i\text{-Pr})_2}$ ), 139.6 (br,  $\text{C}^{\text{C}_6\text{F}_5}$ ), 136.1 (br,  $\text{C}^{\text{C}_6\text{F}_5}$ ), 134.1 ( $\text{C}^{\text{ArC}(\text{Me})}$ ), 129.3 ( $\text{C}^{\text{ArH}}$ ), 123.9 ( $\text{C}^{\text{ArH}}$ ), 122.0 ( $\text{C}^{\text{ArH}}$ ), 75.8 ( $\text{NC}(\text{Me})_2$ ), 51.5 ( $\text{NC}(\text{Me})_2\text{CH}_2$ ), 34.7 ( $\text{BCH}_2$ ), 29.8, 28.9 (DipNC( $\text{Me}$ ) $_2$ ), 27.9, 26.7, 25.4, 22.3, 21.6, 21.1, 13.9 ( $\text{BCC}(\text{Me})_2$ ).

$^{19}\text{F}\{^1\text{H}\}$  NMR (376.5 MHz,  $\text{C}_6\text{D}_6$ ):  $\delta$  -129.8 (br, 1F), -161.2 (t,  $J$  = 20.8 Hz, 2F), -165.2 (br, 2F).

$^{11}\text{B}$  NMR (128.4 MHz,  $\text{CD}_2\text{Cl}_2$ ):  $\delta$  = 20.5 (d,  $J$  = 93 Hz).

HRMS (LIFDI): calculated for  $\text{C}_{26}\text{H}_{31}\text{BF}_5\text{N}$  ( $[\text{M}-\text{H}]^+$ ): 463.2464; found: 463.2475.

## Preparation of boryl radical **4**

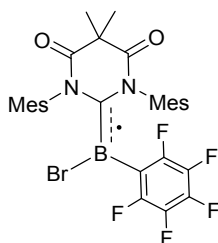

Benzene (15 mL) was added to a mixture of **2** (120 mg, 0.16 mmol) and KC<sub>8</sub> (91 mg, 0.67 mmol) at room temperature. After two hours of vigorous stirring, pentane (20 mL) was added and the reaction mixture was filtered through Celite. All volatiles were removed under reduced pressure, and the crude product was recrystallized from pentane at room temperature to afford **4** as a red solid (51 mg, 48%). X-ray quality single crystals were obtained by slow evaporation of a pentane solution.

**HRMS (LIFDI):** calculated for C<sub>30</sub>H<sub>28</sub>BBrF<sub>5</sub>N<sub>2</sub>O<sub>2</sub> ([M-Br]<sup>+</sup>): 633.1349; found: 633.1342.

## Preparation of **5**

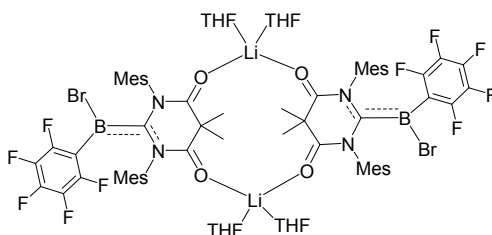

THF (15 mL) was added to a mixture of **2** (100 mg, 0.14 mmol) and Li (4 mg, 0.57 mmol) at room temperature. After twelve hours of stirring, excess Li was filtered off and all the volatiles were removed under reduced pressure to afford **5** as a yellow solid (148 mg, 67%). X-ray quality single crystals were obtained by slow evaporation of a THF solution.

$^1\text{H}\{^{11}\text{B}\}$  NMR (400 MHz,  $d_8$ -THF):  $\delta$  6.63 (s, 4H, Mes(Ar)), 6.35 (s, 4H, Mes(Ar)) 2.22 (s, 12H, Mes( $Me_4$ )), 2.08 (s, 6H, Mes( $Me_2$ )), 2.01 (s, 12H, Mes( $Me_4$ )), 1.95 (s, 6H, Mes( $Me_2$ )), 1.40 (s, 12H, DAC( $Me_4$ )).

$^{13}\text{C}\{^1\text{H}\}$  NMR (101 MHz,  $d_8$ -THF):  $\delta$  165.8, 165.1 (MesNCO), 138.6 ( $C^{C6F5}$ ), 136.9 ( $C^{C6F5}$ ), 136.4 ( $C^{C6F5}$ ), 136.2 ( $C^{ArMe}$ ), 136.1 ( $C^{C6F5}$ ), 135.5, 128.8, 128.4, 128.0, 127.4 ( $C^{ArMe}$  or  $C^{ArH}$ ), 47.1 (NC(O)C( $Me$ ) $_2$ ), 19.9, 19.6, 19.4, 18.8, 18.7.

$^{19}\text{F}\{^1\text{H}\}$  NMR (376.5 MHz,  $d_8$ -THF):  $\delta$  -129.2 (d,  $J$  = 19.4 Hz, 2F), -165.5 (t,  $J$  = 19.1 Hz, 1F), -167.6 (m, 2F).

$^{11}\text{B}$  NMR (128.4 MHz,  $d_8$ -THF):  $\delta$  = 17.2 (br).

**HRMS (ESI-MS negative mode):** calculated for  $[\text{C}_{30}\text{H}_{28}\text{BBrF}_5\text{LiN}_2\text{O}_2]^-$ : 633.1347; found: 633.1338.

**Preparation of **5** from **4**:** A mixture of radical **4** (20 mg, 0.03 mmol) and Li (2 mg, 0.28 mmol) in THF (1 mL) was stirred for four hours at room temperature. Once the red colour had diminished and formed a yellow solution, excess Li was removed by filtration. A slow evaporation of the solution resulted in yellow crystals of **5** (23mg, 53%). The compound was characterized by multinuclear NMR spectroscopy.

## X-ray Crystallographic Details

### Crystal structure determination

The crystal data of **1** were collected on a Bruker SMART-APEX diffractometer with a CCD area detector and graphite monochromated  $\text{Mo}_{K\alpha}$  radiation. The structure was solved using intrinsic phasing method,<sup>5</sup> refined with the ShelXL program<sup>6</sup> and expanded using Fourier techniques. All non-hydrogen atoms were refined anisotropically. Hydrogen atoms were included in structure factor calculations. All hydrogen atoms were assigned to idealised geometric positions.

Crystal data for **1**:  $\text{C}_{26}\text{H}_{31}\text{BBr}_2\text{F}_5\text{N}$ ,  $M_r = 623.15$ , colourless block,  $0.3 \times 0.2 \times 0.1 \text{ mm}^3$ , monoclinic space group  $P2_1/n$ ,  $a = 11.6404(4) \text{ \AA}$ ,  $b = 15.7259(5) \text{ \AA}$ ,  $c = 14.2888(5) \text{ \AA}$ ,  $\beta = 99.812(2)^\circ$ ,  $V = 2577.39(15) \text{ \AA}^3$ ,  $Z = 4$ ,  $\rho_{\text{calcd}} = 1.606 \text{ g}\cdot\text{cm}^{-3}$ ,  $\mu = 3.197 \text{ mm}^{-1}$ ,  $F(000) = 1256$ ,  $T = 100(2) \text{ K}$ ,  $R_I = 0.0399$ ,  $wR^2 = 0.0784$ , 6463 independent reflections [ $2\theta \leq 56.81^\circ$ ] and 324 parameters.

Crystallographic data have been deposited with the Cambridge Crystallographic Data Center as supplementary publication no. CCDC-**1839159**. These data can be obtained free of charge from The Cambridge Crystallographic Data Centre via [www.ccdc.cam.ac.uk/data\\_request/cif](http://www.ccdc.cam.ac.uk/data_request/cif)



## Crystal structure determination

The crystal data of **2** were collected on a Bruker X8-APEX II diffractometer with a CCD area detector and multi-layer mirror monochromated Mo<sub>Kα</sub> radiation. The structure was solved using intrinsic phasing method,<sup>5</sup> refined with the ShelXL program<sup>6</sup> and expanded using Fourier techniques. All non-hydrogen atoms were refined anisotropically. Hydrogen atoms were included in structure factor calculations. All hydrogen atoms were assigned to idealised geometric positions.

Crystal data for **2**: C<sub>30</sub>H<sub>28</sub>BBr<sub>2</sub>F<sub>5</sub>N<sub>2</sub>O<sub>2</sub>,  $M_r = 714.17$ , colourless plate, 0.444×0.286×0.15 mm<sup>3</sup>, orthorhombic space group  $P2_12_12_1$ ,  $a = 8.492(5) \text{ \AA}$ ,  $b = 15.351(7) \text{ \AA}$ ,  $c = 22.229(11) \text{ \AA}$ ,  $V = 2898(3) \text{ \AA}^3$ ,  $Z = 4$ ,  $\rho_{\text{calcd}} = 1.637 \text{ g}\cdot\text{cm}^{-3}$ ,  $\mu = 2.862 \text{ mm}^{-1}$ ,  $F(000) = 1432$ ,  $T = 103(2) \text{ K}$ ,  $R_I = 0.0572$ ,  $wR^2 = 0.0838$ , 5708 independent reflections [ $2\theta \leq 52.044^\circ$ ] and 387 parameters.

Crystallographic data have been deposited with the Cambridge Crystallographic Data Center as supplementary publication no. CCDC-**1839162**. These data can be obtained free of charge from The Cambridge Crystallographic Data Centre via [www.ccdc.cam.ac.uk/data\\_request/cif](http://www.ccdc.cam.ac.uk/data_request/cif)

## Crystal structure determination

The crystal data of **3** were collected on a Bruker D8 Quest diffractometer with a CMOS area detector and multi-layer mirror monochromated Mo<sub>K</sub>α radiation. The structure was solved using intrinsic phasing method,<sup>5</sup> refined with the ShelXL program<sup>6</sup> and expanded using Fourier techniques. All non-hydrogen atoms were refined anisotropically. Hydrogen atoms were included in structure factor calculations. All hydrogen atoms except H1 were assigned to idealised positions. The coordinates of H1 was refined freely.

Crystal data for **3**: C<sub>29</sub>H<sub>34</sub>BF<sub>5</sub>N,  $M_r = 502.38$ , colourless needle, 0.40×0.10×0.09 mm<sup>3</sup>, monoclinic space group  $P2_1/n$ ,  $a = 7.7509(4)$  Å,  $b = 10.5075(7)$  Å,  $c = 31.1985(19)$  Å,  $\beta = 91.565(2)^\circ$ ,  $V = 2539.9(3)$  Å<sup>3</sup>,  $Z = 4$ ,  $\rho_{\text{calcd}} = 1.314$  g·cm<sup>-3</sup>,  $\mu = 0.101$  mm<sup>-1</sup>,  $F(000) = 1060$ ,  $T = 100(2)$  K,  $R_1 = 0.0790$ ,  $wR^2 = 0.1369$ , 5185 independent reflections [ $2\theta \leq 52.744^\circ$ ] and 336 parameters.

Crystallographic data have been deposited with the Cambridge Crystallographic Data Center as supplementary publication no. CCDC-**1839161**. These data can be obtained free of charge from The Cambridge Crystallographic Data Centre via [www.ccdc.cam.ac.uk/data\\_request/cif](http://www.ccdc.cam.ac.uk/data_request/cif)

## Crystal structure determination

The crystal data of **4** were collected on a BRUKER X8-APEX II diffractometer with a CCD area detector and multi-layer mirror monochromated Mo<sub>K</sub>α radiation. The structure was solved using intrinsic phasing method,<sup>5</sup> refined with the SHELXL program<sup>6</sup> and expanded using Fourier techniques. All non-hydrogen atoms were refined anisotropically. Hydrogen atoms were included in structure factor calculations. All hydrogen atoms were assigned to idealised geometric positions.

Crystal data for **4**: C<sub>30</sub>H<sub>28</sub>BBrF<sub>5</sub>N<sub>2</sub>O<sub>2</sub>,  $M_r = 634.26$ , red block, 0.20×0.20×0.20 mm<sup>3</sup>, triclinic space group  $P\bar{1}$ ,  $a = 7.394(2)$  Å,  $b = 11.982(4)$  Å,  $c = 16.917(6)$  Å,  $\alpha = 104.90(2)^\circ$ ,  $\beta = 102.465(12)^\circ$ ,  $\gamma = 99.493(19)^\circ$ ,  $V = 1375.2(8)$  Å<sup>3</sup>,  $Z = 2$ ,  $\rho_{\text{calcd}} = 1.532$  g·cm<sup>-3</sup>,  $\mu = 1.561$  mm<sup>-1</sup>,  $F(000) = 646$ ,  $T = 100(2)$  K,  $R_I = 0.0463$ ,  $wR^2 = 0.0922$ , 5920 independent reflections [ $2\theta \leq 53.798^\circ$ ] and 378 parameters.

Crystallographic data have been deposited with the Cambridge Crystallographic Data Center as supplementary publication no. CCDC-**1839160**. These data can be obtained free of charge from The Cambridge Crystallographic Data Centre via [www.ccdc.cam.ac.uk/data\\_request/cif](http://www.ccdc.cam.ac.uk/data_request/cif)

## Crystal structure determination

The crystal data of **5** were collected on a Bruker D8 Quest diffractometer with a CMOS area detector and multi-layer mirror monochromated Mo<sub>K $\alpha$</sub>  radiation. The structure was solved using intrinsic phasing method,<sup>5</sup> refined with the ShelXL program<sup>6</sup> and expanded using Fourier techniques. All non-hydrogen atoms were refined anisotropically. Hydrogen atoms were included in structure factors calculations. All hydrogen atoms were assigned to idealised geometric positions.

Crystal data for **5**: C<sub>84</sub>H<sub>104</sub>B<sub>2</sub>Br<sub>2</sub>F<sub>10</sub>Li<sub>2</sub>N<sub>4</sub>O<sub>10</sub>,  $M_r = 1715.03$ , yellow block, 0.21×0.11×0.06 mm<sup>3</sup>, monoclinic space group  $P2_1/c$ ,  $a = 10.2637(10)$  Å,  $b = 24.161(3)$  Å,  $c = 16.6779(17)$  Å,  $\beta = 97.972(4)^\circ$ ,  $V = 4095.8(7)$  Å<sup>3</sup>,  $Z = 2$ ,  $\rho_{\text{calcd}} = 1.391$  g·cm<sup>-3</sup>,  $\mu = 1.073$  mm<sup>-1</sup>,  $F(000) = 1784$ ,  $T = 100(2)$  K,  $R_I = 0.0853$ ,  $wR^2 = 0.1031$ , 8075 independent reflections [ $2\theta \leq 52.04^\circ$ ] and 542 parameters.

Crystallographic data have been deposited with the Cambridge Crystallographic Data Center as supplementary publication no. CCDC-**1839163**. These data can be obtained free of charge from The Cambridge Crystallographic Data Centre via [www.ccdc.cam.ac.uk/data\\_request/cif](http://www.ccdc.cam.ac.uk/data_request/cif)

## Electrochemical details

Cyclic voltammetry experiments were performed using a Gamry Instruments Reference 600 potentiostat. A standard three-electrode cell configuration was employed using a platinum disk working electrode, a platinum wire counter electrode, and a silver wire, separated by a *Vycor* tip, serving as the reference electrode. Formal redox potentials are referenced to the ferrocene/ferrocenium ( $[\text{Cp}_2\text{Fe}]^{+/0}$ ) redox couple by using ferrocene as an internal standard. Tetra-*n*-butylammonium hexafluorophosphate ( $[\text{n-Bu}_4\text{N}][\text{PF}_6]$ ) was employed as the supporting electrolyte. Compensation for resistive losses ( $iR$  drop) was employed for all measurements.

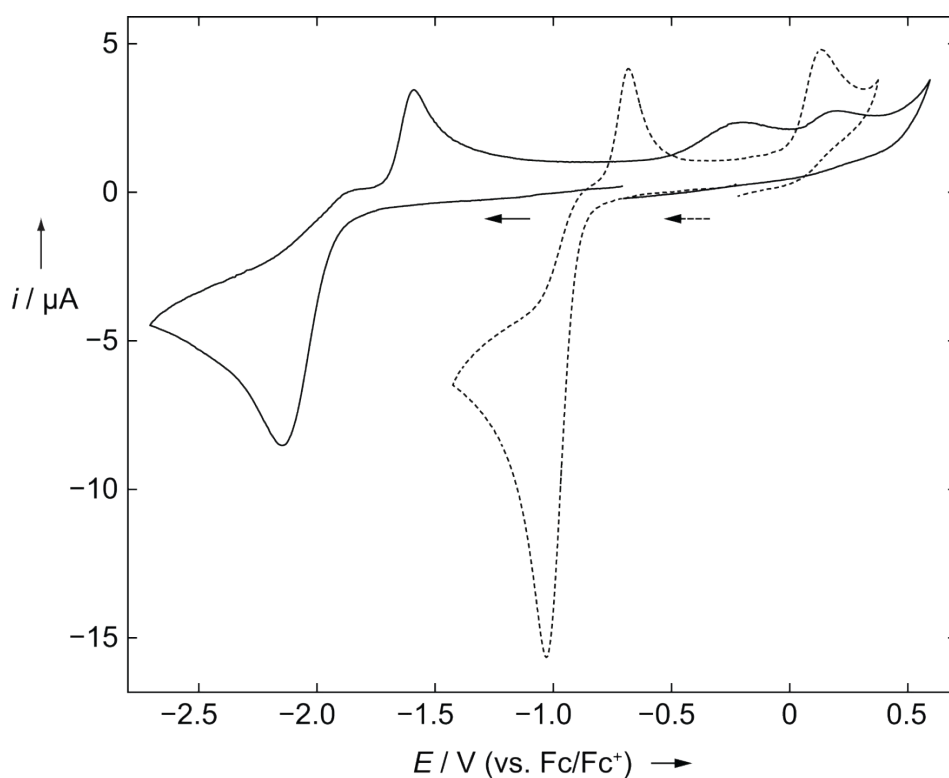

**Fig. S1.** Cyclic voltammograms of **1** (solid line) and **2** (dashed line) in THF/0.1 M  $[\text{n-Bu}_4\text{N}][\text{PF}_6]$  measured at  $250 \text{ mV s}^{-1}$ . Formal potentials: **1**:  $E_{\text{pc}} = -2.15 \text{ V}$ ,  $E_{\text{pa}} = -1.59 \text{ V}$ ,  $E_{\text{pa}} = -0.21 \text{ V}$ ,  $E_{\text{pa}} = 0.19 \text{ V}$ ; **2**:  $E_{\text{pc}} = -1.01 \text{ V}$ ,  $E_{\text{pa}} = -0.68 \text{ V}$ ;  $E_{\text{pa}} = 0.13 \text{ V}$  (relative to the  $\text{Fc}/\text{Fc}^+$  couple).

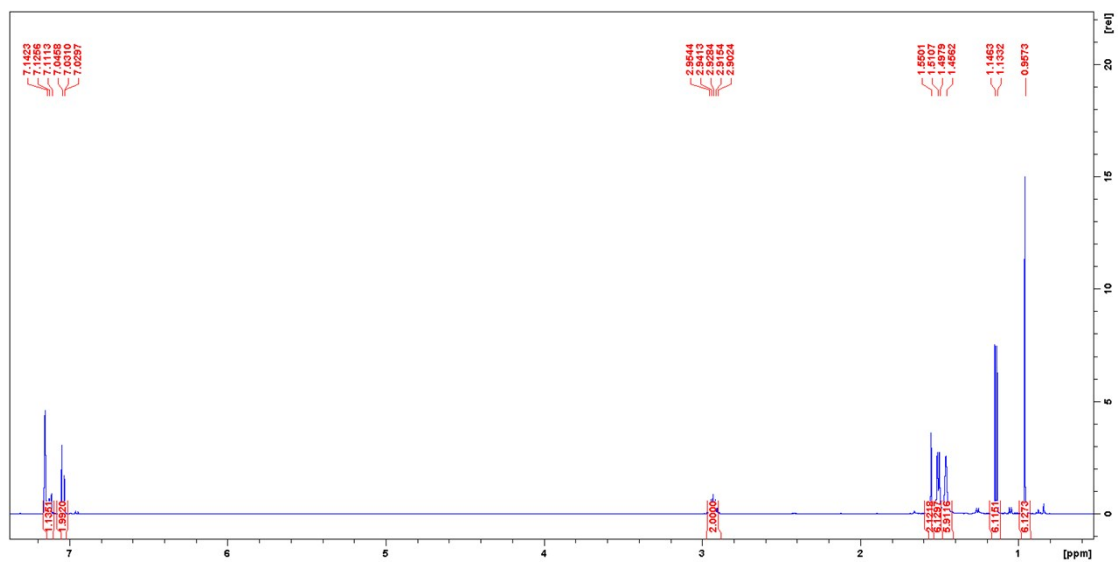

Fig. S2.  $^1\text{H}$  NMR of compound **1** in  $\text{C}_6\text{D}_6$  at  $70\text{ }^\circ\text{C}$ .

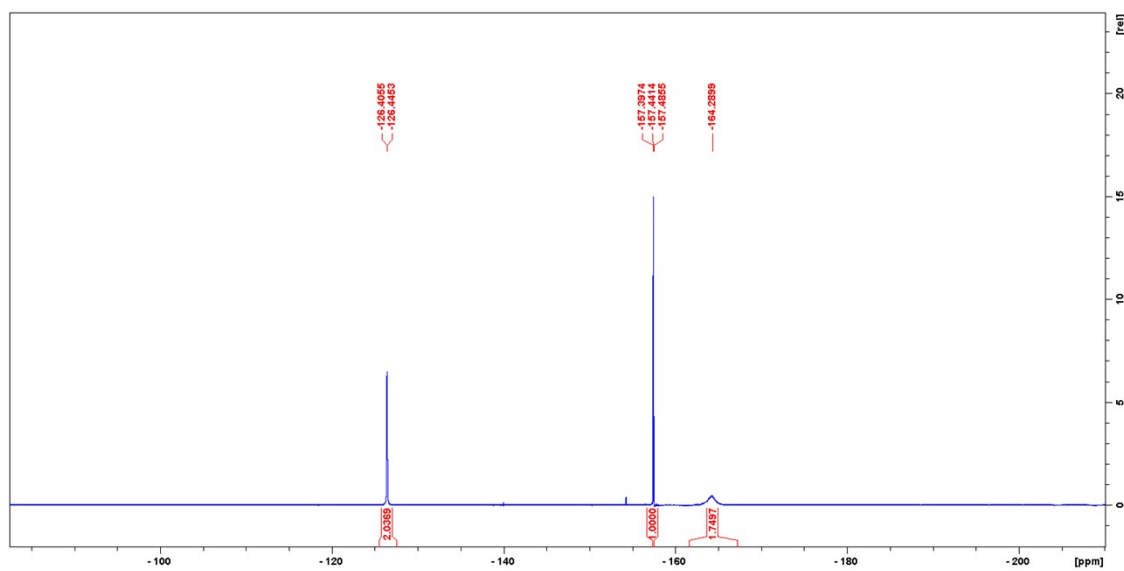

Fig. S3.  $^9\text{F}\{^1\text{H}\}$  NMR of compound **1** in  $\text{C}_6\text{D}_6$ .

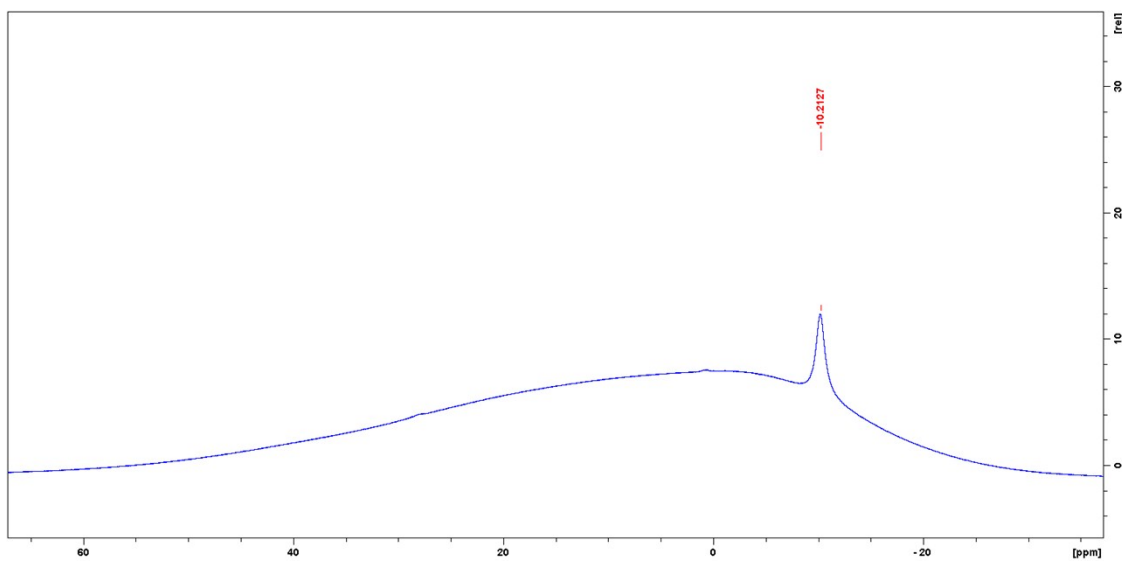

**Fig. S4.**  $^{11}\text{B}$  NMR of compound **1** in  $\text{C}_6\text{D}_6$ .

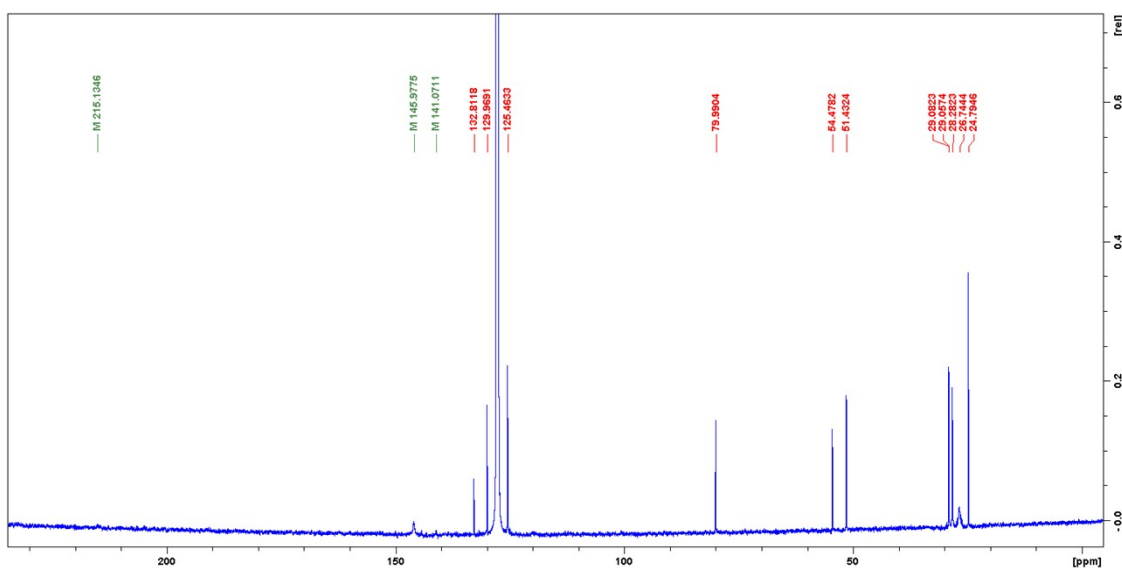

**Fig. S5.**  $^{13}\text{C}\{^1\text{H}\}$  NMR of compound **1** in  $\text{C}_6\text{D}_6$ .

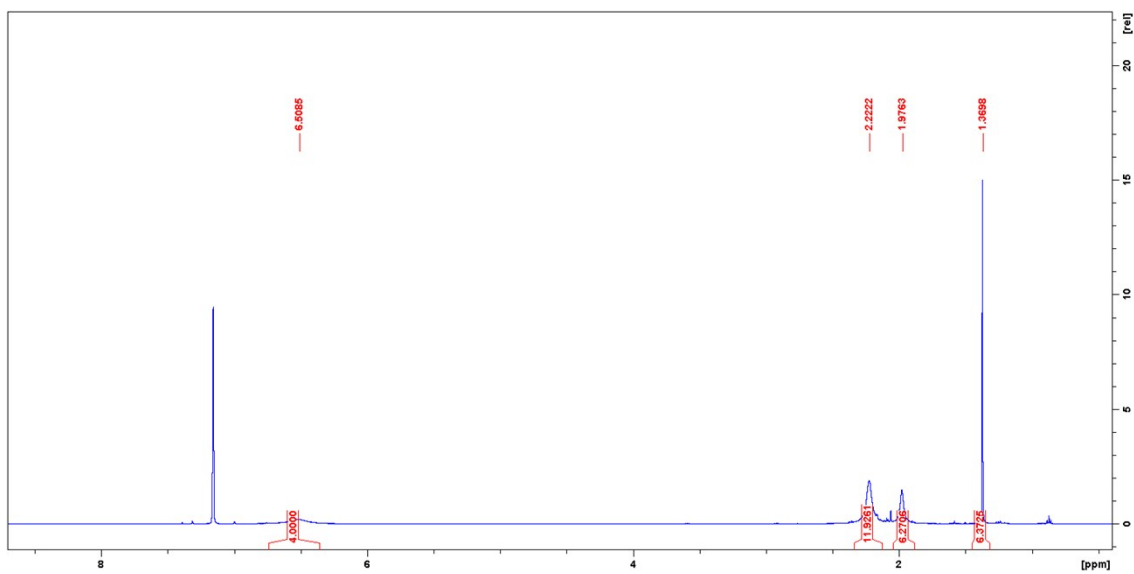

Fig. S6. <sup>1</sup>H NMR of compound 2 in C<sub>6</sub>D<sub>6</sub>.

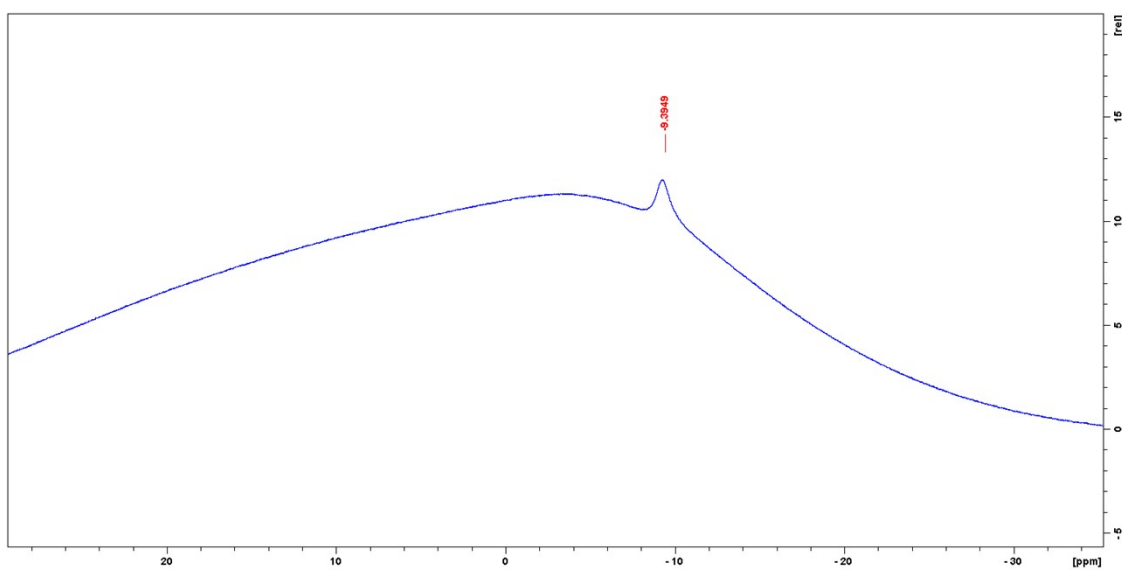

Fig. S7. <sup>11</sup>B NMR of compound 2 in C<sub>6</sub>D<sub>6</sub>.



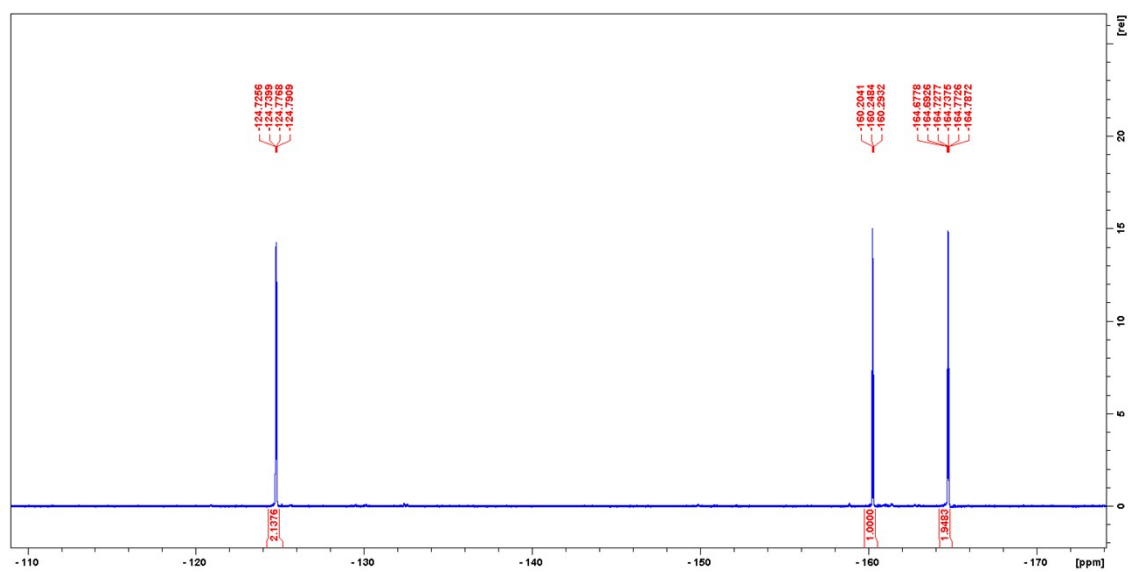

Fig. S8.  $^9\text{F}\{^1\text{H}\}$  NMR of compound 2 in  $\text{C}_6\text{D}_6$ .

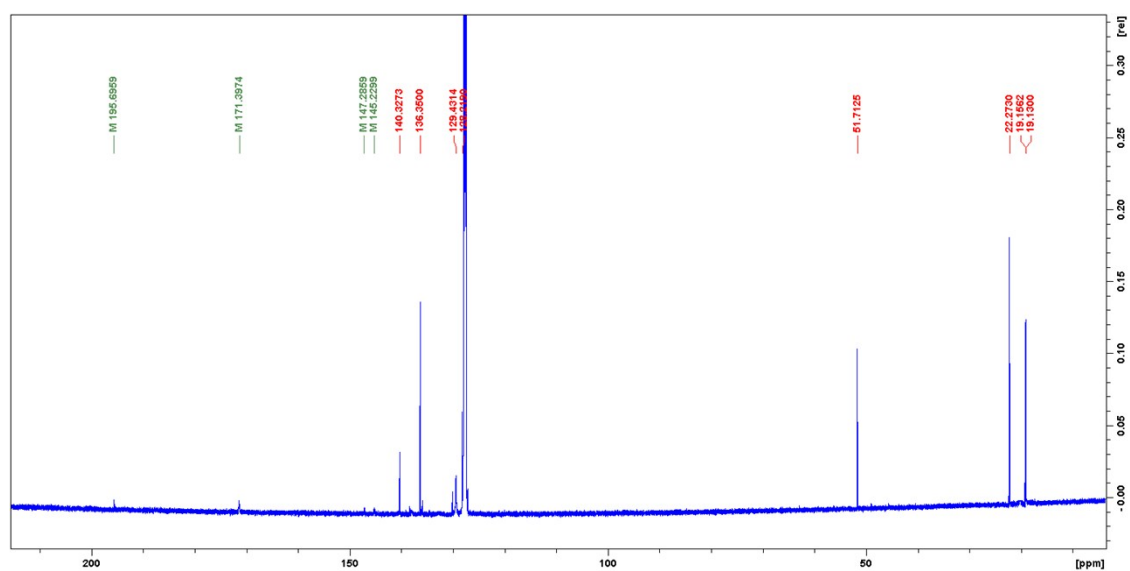

Fig. S9.  $^{13}\text{C}\{^1\text{H}\}$  NMR of compound 2 in  $\text{C}_6\text{D}_6$ .

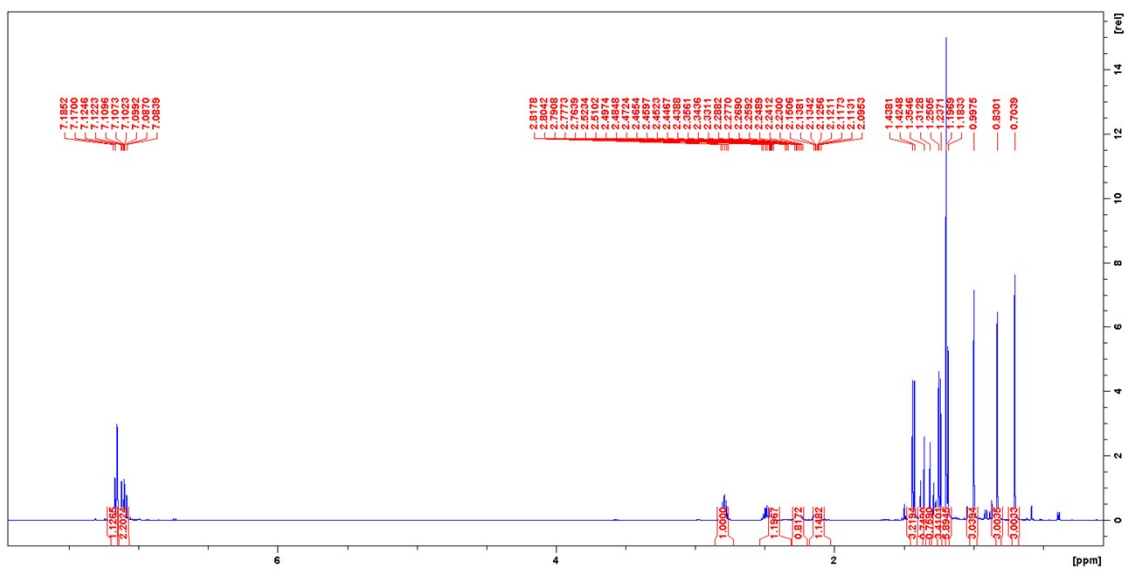

Fig. S10.  $^1\text{H}\{^{11}\text{B}\}$  NMR of compound **3** in  $\text{C}_6\text{D}_6$

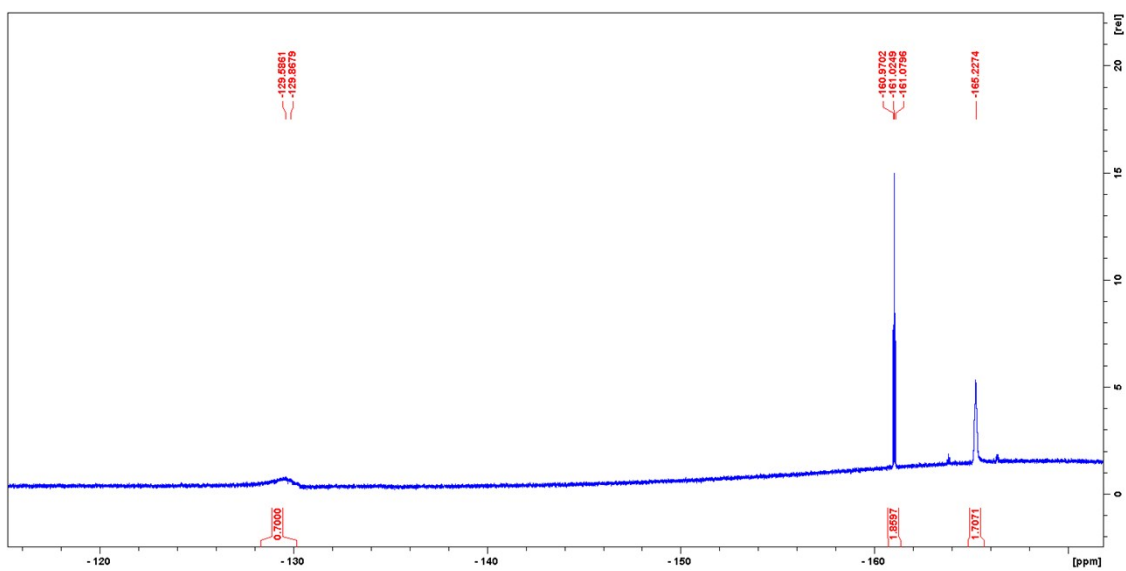

Fig. S11.  $^9\text{F}\{^1\text{H}\}$  NMR of compound **3** in  $\text{C}_6\text{D}_6$

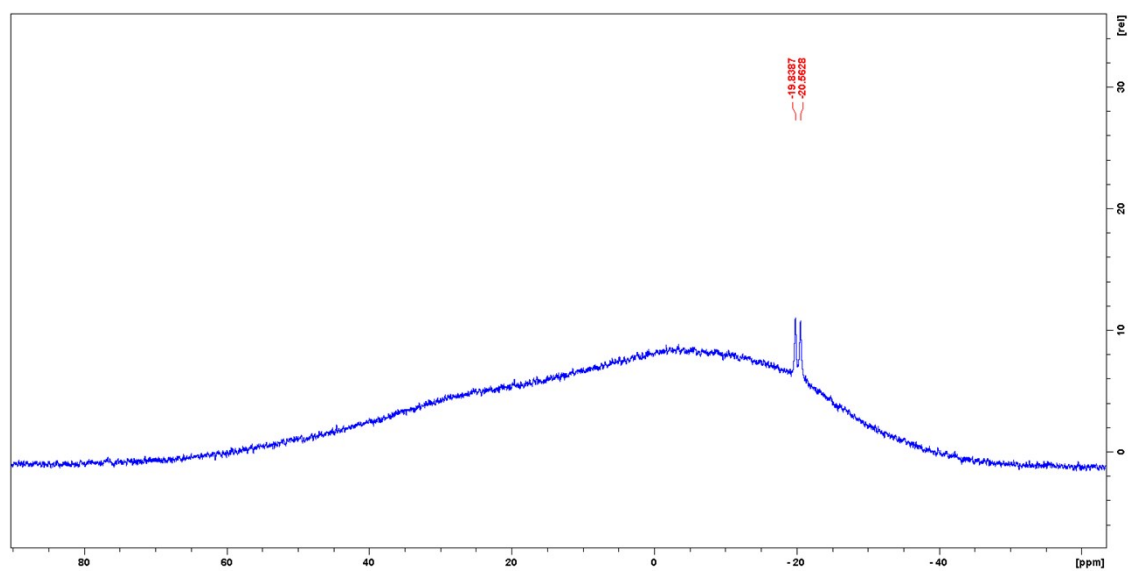

Fig. S12. <sup>11</sup>B NMR of compound 3 in C<sub>6</sub>D<sub>6</sub>.

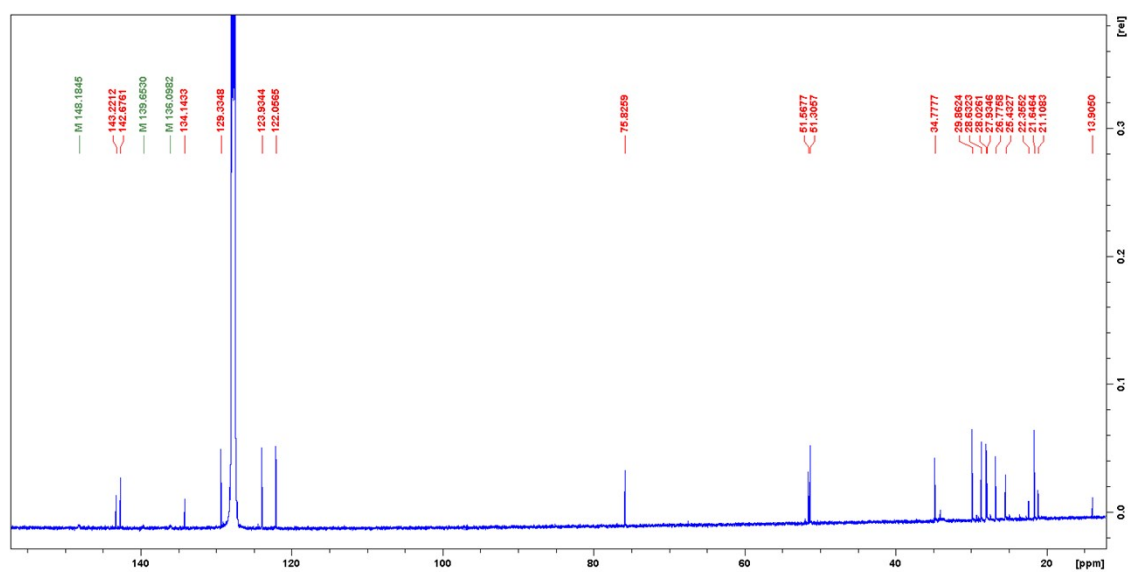

Fig. S13. <sup>13</sup>C{<sup>1</sup>H} NMR of compound 3 in C<sub>6</sub>D<sub>6</sub>.

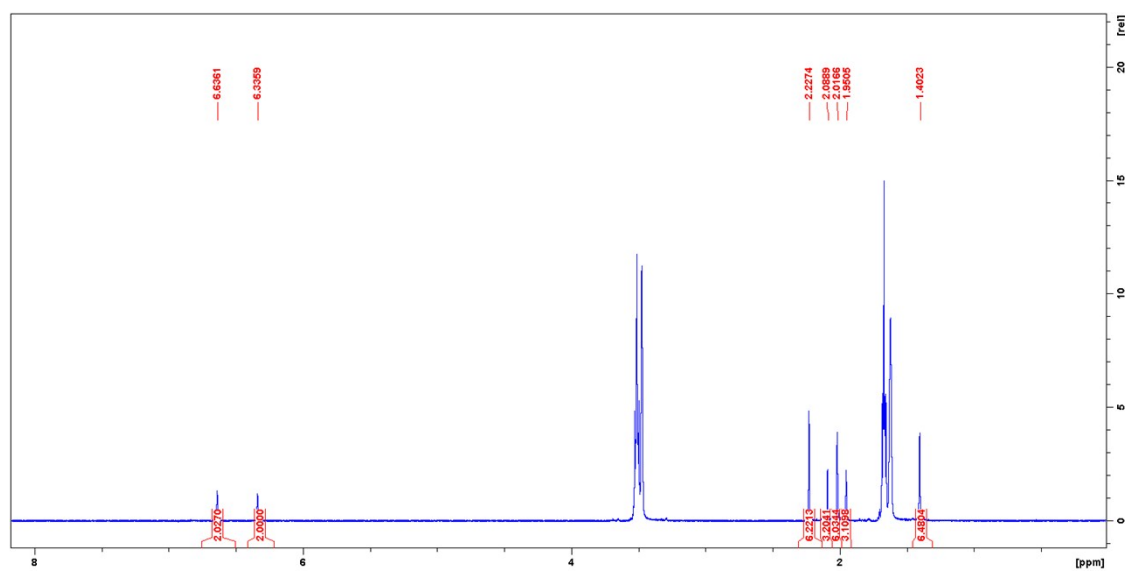

Fig. S14.  $^1\text{H}$  NMR of compound **5** in  $d_8$ -THF.

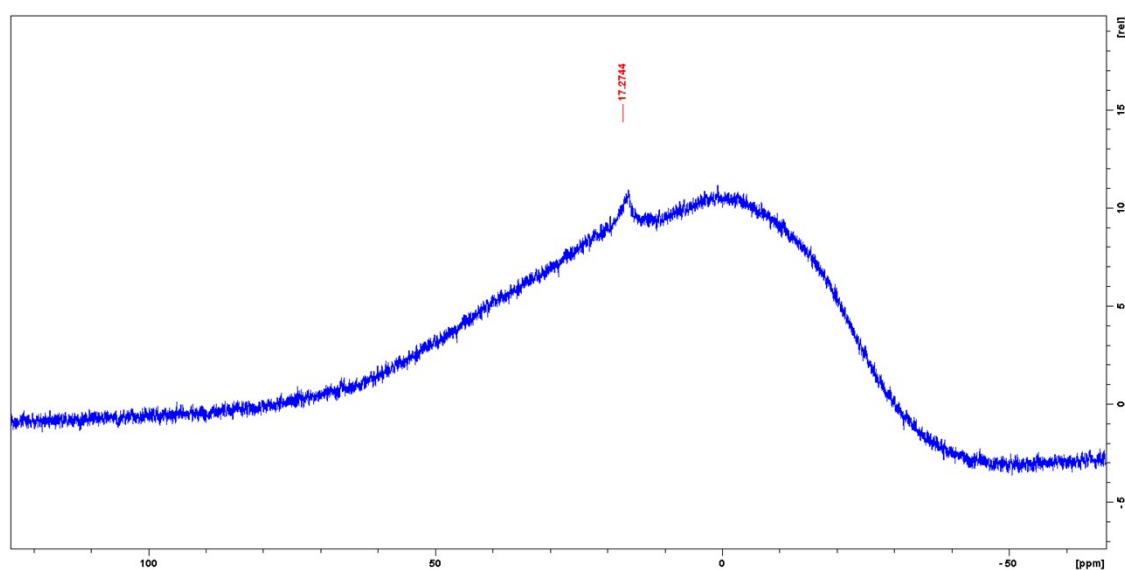

Fig. S15.  $^{11}\text{B}\{^1\text{H}\}$  NMR of compound **5** in  $d_8$ -THF.

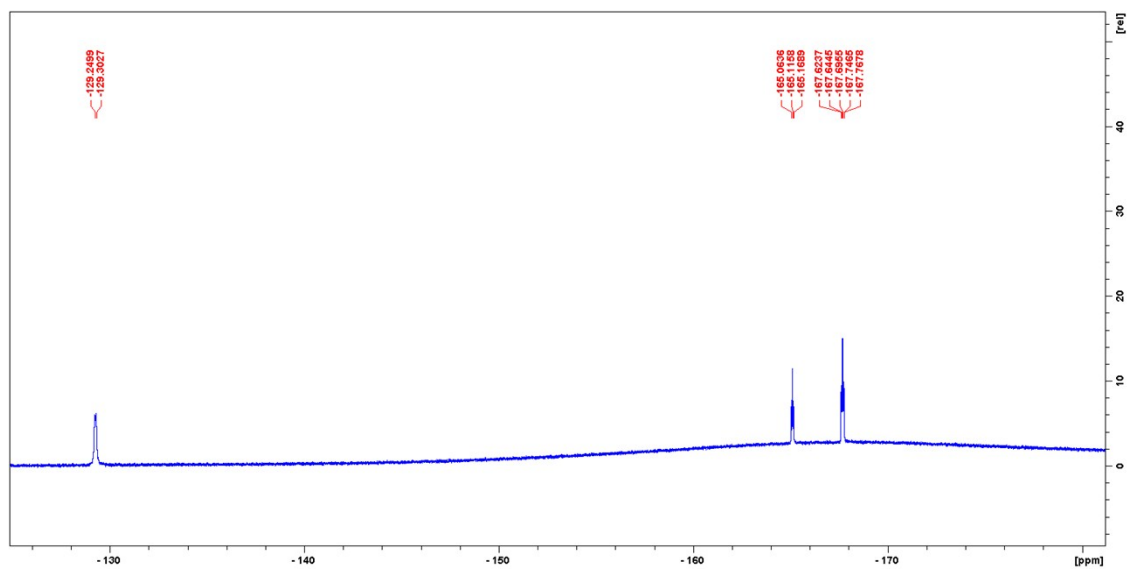

**Fig. S16.**  $^9\text{F}\{^1\text{H}\}$  NMR of compound **5** in  $d_8$ -THF.

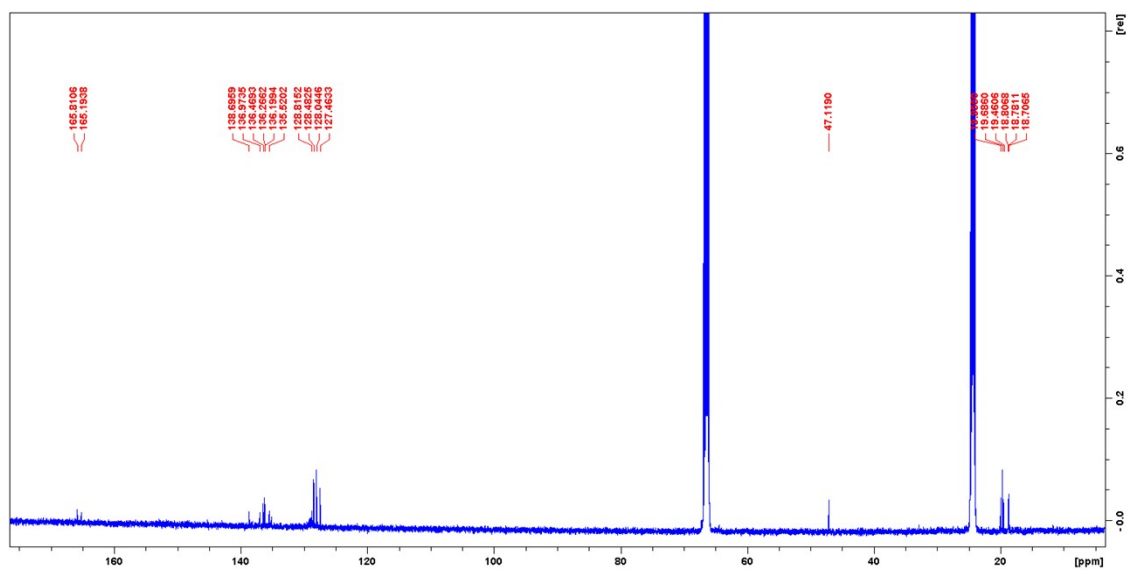

**Fig. S17.**  $^{13}\text{C}\{^1\text{H}\}$  NMR of compound **5** in  $d_8$ -THF.

## Computational Details

All calculations were performed using the Gaussian 09<sup>7</sup> suite of programs and unrestricted methods. The uB3LYP hybrid functional<sup>8</sup> was used in conjunction with the Def2-TZVP(P) basis set for all atoms.<sup>9</sup> The optimized geometry was confirmed to have all-real frequencies by vibrational analysis at the same level of theory.

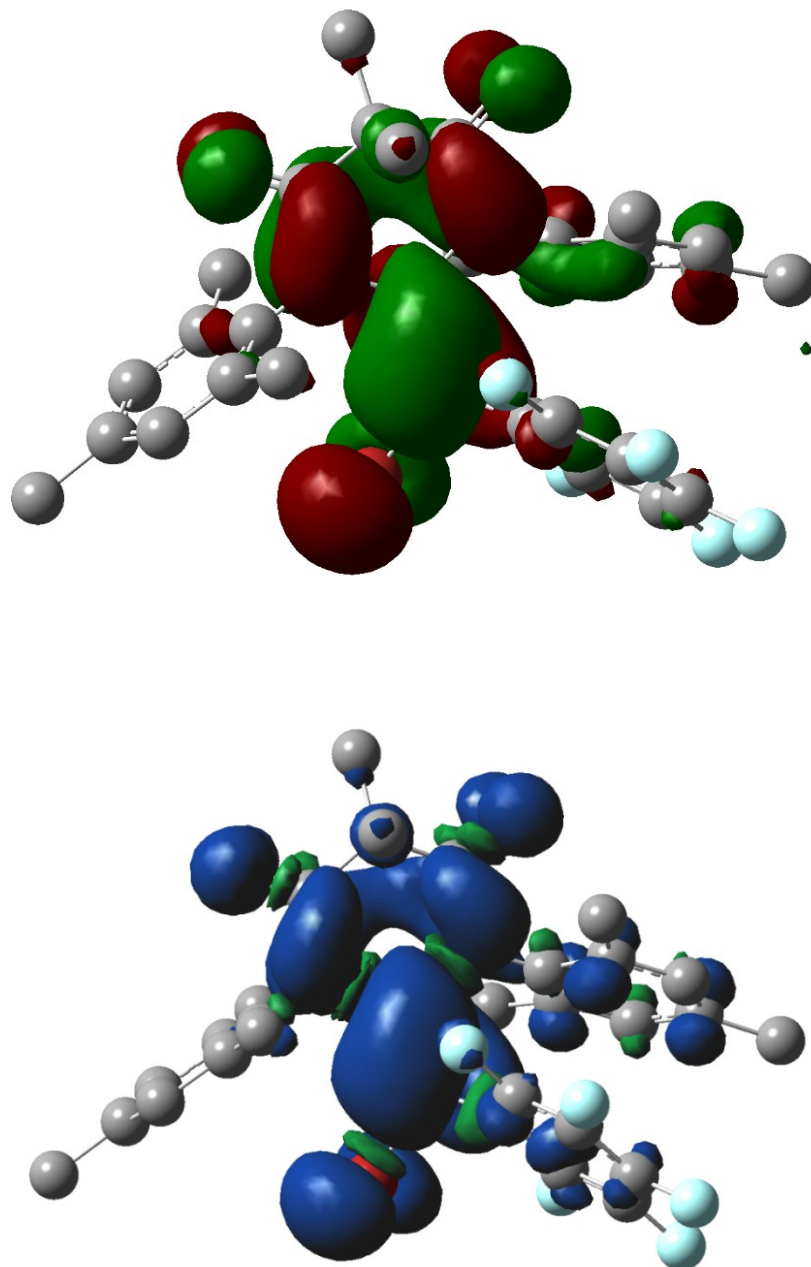

**Fig. S18.** Kohn-Sham SOMO of **4** (top) and spin density (SCF, bottom). Hydrogen atoms omitted for clarity.

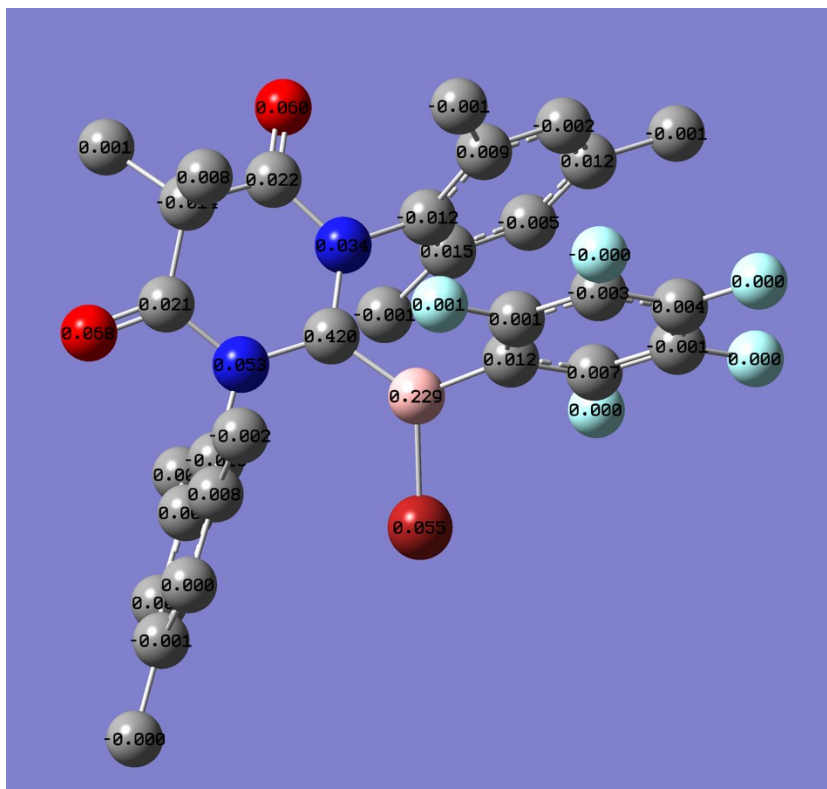

**Fig. S19.** Values for the spin density of **4** obtained from a Mulliken spin population analysis.

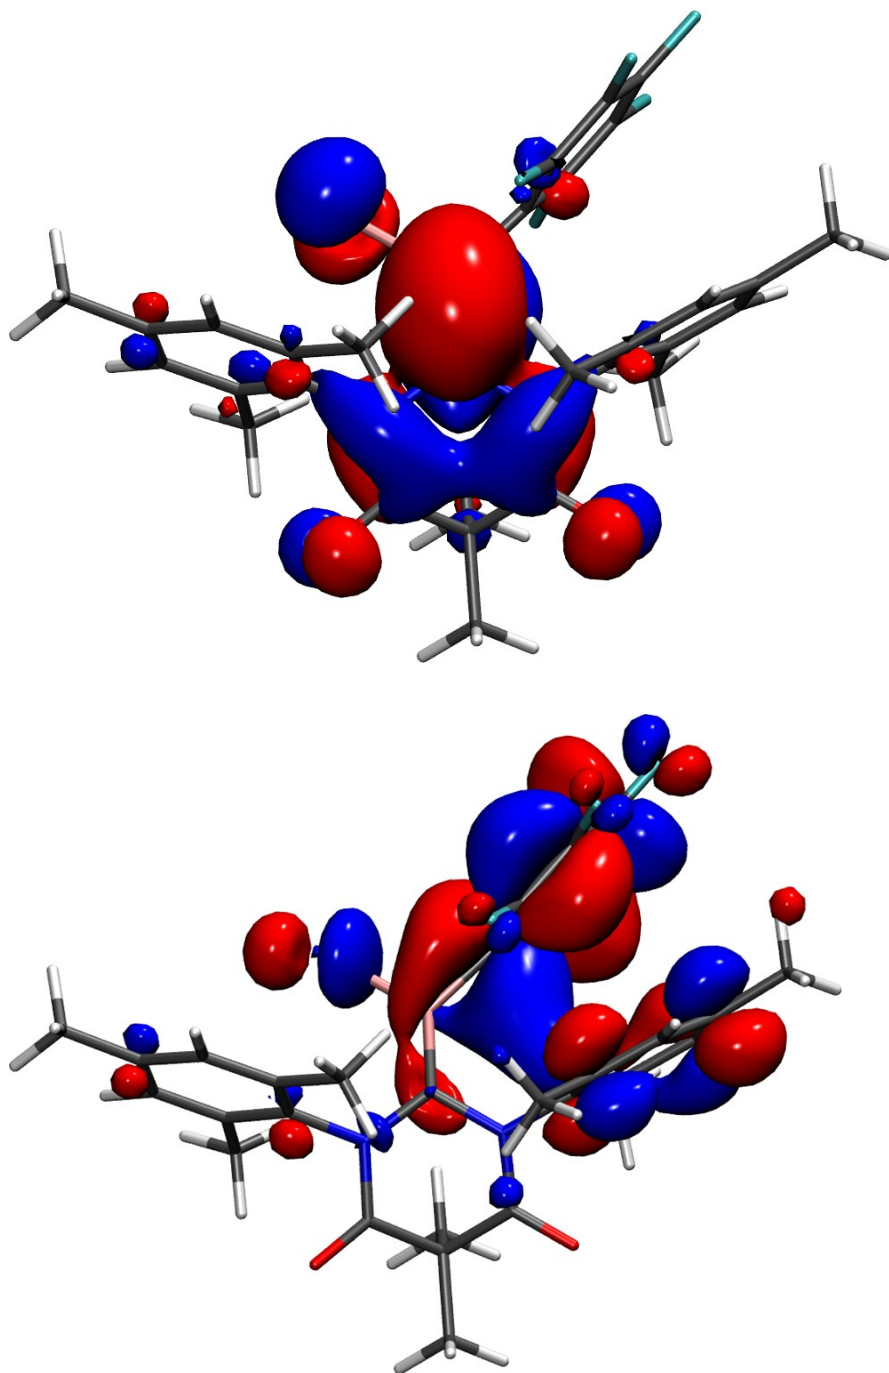

**Fig. S20.** Kohn-Sham HOMO (top) and LUMO (bottom) of **5**.



### Cartesian Coordinates of 4

|   |             |             |             |
|---|-------------|-------------|-------------|
| C | -2.17514800 | 2.20271500  | 11.61553400 |
| N | -2.36366000 | 0.86808400  | 11.24889600 |
| C | -3.11764400 | -0.04878700 | 12.00097500 |
| C | -3.61262800 | 0.40443400  | 13.36338500 |
| C | -3.89029700 | 1.89424700  | 13.37560100 |
| N | -3.03711800 | 2.69581200  | 12.60403700 |
| O | -3.29647700 | -1.17637900 | 11.59933600 |
| O | -4.76907400 | 2.38714000  | 14.04608600 |
| C | -2.48825300 | 0.11452400  | 14.39597500 |
| H | -2.28555200 | -0.95556200 | 14.41309400 |
| H | -2.82123100 | 0.42157800  | 15.38662400 |
| H | -1.56376700 | 0.64001200  | 14.16193300 |
| C | -4.87751700 | -0.37027500 | 13.74677800 |
| H | -5.68515500 | -0.18048300 | 13.04101700 |
| H | -5.21281700 | -0.06156200 | 14.73355500 |
| H | -4.66748400 | -1.43648000 | 13.74533900 |
| C | -1.69564000 | 0.26397100  | 10.10082300 |
| C | -0.43327700 | -0.30836400 | 10.26770400 |
| C | 0.16255700  | -0.91210500 | 9.16250700  |
| H | 1.14792400  | -1.34704800 | 9.27781700  |
| C | -0.47427100 | -0.98547400 | 7.92858900  |
| C | -1.75567400 | -0.45158000 | 7.82065600  |
| H | -2.28367100 | -0.52441700 | 6.87733900  |
| C | -2.38913000 | 0.16995200  | 8.89147300  |
| C | 0.27569700  | -0.31615500 | 11.59429200 |
| H | 1.26797500  | -0.75186900 | 11.49249800 |
| H | -0.27191100 | -0.91276700 | 12.32690100 |
| H | 0.39297000  | 0.68358300  | 12.00975600 |
| C | 0.20168900  | -1.61720300 | 6.74087000  |
| H | -0.51357900 | -2.14896000 | 6.11283600  |
| H | 0.97307000  | -2.32217800 | 7.04979100  |
| H | 0.68129200  | -0.85886900 | 6.11670100  |
| C | -3.78560900 | 0.70250700  | 8.72984700  |
| H | -3.83301700 | 1.77584100  | 8.91288200  |
| H | -4.47537300 | 0.21606400  | 9.42152800  |
| H | -4.14599800 | 0.52198500  | 7.71879100  |
| C | -3.25556000 | 4.12820600  | 12.73958200 |
| C | -3.94098300 | 4.81846400  | 11.73122100 |
| C | -4.14905500 | 6.18631700  | 11.89463600 |
| H | -4.67383900 | 6.72551700  | 11.11544500 |
| C | -3.72078600 | 6.87087000  | 13.02622700 |

|    |             |            |             |
|----|-------------|------------|-------------|
| C  | -3.09832800 | 6.13860300 | 14.03383800 |
| H  | -2.79046900 | 6.64312700 | 14.94200500 |
| C  | -2.86918400 | 4.77081800 | 13.92425100 |
| C  | -4.48655900 | 4.13721800 | 10.50504700 |
| H  | -5.25243400 | 4.75767400 | 10.04298100 |
| H  | -4.93699100 | 3.17427000 | 10.74453500 |
| H  | -3.71136300 | 3.96423100 | 9.75650700  |
| C  | -3.91996900 | 8.35689900 | 13.15685400 |
| H  | -3.05990600 | 8.90019100 | 12.75707000 |
| H  | -4.03691600 | 8.65324200 | 14.19920500 |
| H  | -4.79953400 | 8.68995900 | 12.60618700 |
| C  | -2.27007400 | 4.03455000 | 15.09134700 |
| H  | -1.60158800 | 3.23220600 | 14.78714300 |
| H  | -3.06224900 | 3.58646700 | 15.69467900 |
| H  | -1.71090200 | 4.71688200 | 15.72970700 |
| Br | -0.53313000 | 3.08299400 | 9.15927000  |
| B  | -1.12197200 | 3.14989400 | 11.01843200 |
| C  | -0.36694400 | 4.26472400 | 11.84533100 |
| C  | 0.40855200  | 3.93996400 | 12.95490500 |
| C  | 1.18229900  | 4.86202200 | 13.64261500 |
| C  | 1.19207000  | 6.18320000 | 13.22376700 |
| C  | 0.43360800  | 6.55691500 | 12.12282600 |
| C  | -0.31808700 | 5.60455000 | 11.45464000 |
| F  | 0.44327300  | 2.66798100 | 13.40263800 |
| F  | 1.91017400  | 4.49161200 | 14.69990100 |
| F  | 1.91907800  | 7.08871300 | 13.87580200 |
| F  | 0.42969400  | 7.83180300 | 11.72564400 |
| F  | -1.03752700 | 6.02478600 | 10.40769900 |

### Cartesian Coordinates of 5

|   |           |           |           |
|---|-----------|-----------|-----------|
| C | -1.930338 | 2.044267  | 11.867712 |
| N | -2.221070 | 0.707580  | 11.377414 |
| C | -3.095621 | -0.132459 | 12.019387 |
| C | -3.566295 | 0.326817  | 13.397723 |
| C | -3.911641 | 1.812891  | 13.345585 |
| N | -3.073939 | 2.593574  | 12.596261 |
| O | -3.469216 | -1.197538 | 11.541706 |
| O | -4.874138 | 2.269986  | 13.954548 |
| C | -2.415702 | 0.117687  | 14.412927 |
| H | -2.166288 | -0.942549 | 14.469014 |
| H | -2.734219 | 0.448689  | 15.402050 |
| H | -1.520261 | 0.669576  | 14.131377 |
| C | -4.789679 | -0.479649 | 13.832357 |
| H | -5.613309 | -0.355118 | 13.131413 |
| H | -5.124169 | -0.140290 | 14.810586 |
| H | -4.539003 | -1.537878 | 13.871121 |
| C | -1.627551 | 0.167769  | 10.172004 |
| C | -0.737019 | -0.913755 | 10.274711 |
| C | -0.202362 | -1.456872 | 9.111967  |
| H | 0.492208  | -2.285128 | 9.200319  |
| C | -0.516510 | -0.963294 | 7.849610  |
| C | -1.411550 | 0.094983  | 7.776442  |
| H | -1.690837 | 0.490589  | 6.806048  |
| C | -1.983074 | 0.664154  | 8.914735  |
| C | -0.337105 | -1.493899 | 11.602083 |
| H | 0.537320  | -2.134569 | 11.488087 |
| H | -1.148461 | -2.091781 | 12.021260 |
| H | -0.090149 | -0.710451 | 12.317359 |
| C | 0.115525  | -1.541103 | 6.609523  |
| H | -0.489889 | -1.340255 | 5.724501  |
| H | 0.243416  | -2.621934 | 6.693051  |
| H | 1.105518  | -1.110584 | 6.432453  |
| C | -2.967691 | 1.782807  | 8.758365  |
| H | -2.553621 | 2.718112  | 9.133645  |
| H | -3.879461 | 1.585753  | 9.321446  |
| H | -3.234323 | 1.917256  | 7.709892  |
| C | -3.274143 | 4.015930  | 12.768528 |
| C | -4.015212 | 4.753883  | 11.841026 |
| C | -4.185197 | 6.123336  | 12.053443 |
| H | -4.752978 | 6.692413  | 11.325525 |
| C | -3.670783 | 6.768907  | 13.169052 |
| C | -3.006719 | 5.994176  | 14.116866 |

|    |           |          |           |
|----|-----------|----------|-----------|
| H  | -2.633884 | 6.463338 | 15.020587 |
| C  | -2.814559 | 4.627490 | 13.947446 |
| C  | -4.675007 | 4.125676 | 10.646501 |
| H  | -5.611064 | 4.639706 | 10.424707 |
| H  | -4.893724 | 3.075193 | 10.818169 |
| H  | -4.042030 | 4.194760 | 9.761959  |
| C  | -3.821241 | 8.256975 | 13.350292 |
| H  | -2.935426 | 8.787868 | 12.990539 |
| H  | -3.951893 | 8.519768 | 14.401347 |
| H  | -4.678355 | 8.640297 | 12.795252 |
| C  | -2.176651 | 3.831506 | 15.052843 |
| H  | -1.477986 | 3.088690 | 14.675938 |
| H  | -2.948083 | 3.304066 | 15.618984 |
| H  | -1.640332 | 4.486372 | 15.739216 |
| Br | 0.987822  | 1.949646 | 10.849566 |
| B  | -0.675370 | 2.758342 | 11.680315 |
| C  | -0.298963 | 4.272776 | 12.008214 |
| C  | 0.525982  | 4.618609 | 13.075837 |
| C  | 0.967601  | 5.910813 | 13.311976 |
| C  | 0.594254  | 6.927483 | 12.447422 |
| C  | -0.208286 | 6.629998 | 11.359033 |
| C  | -0.629353 | 5.323709 | 11.157978 |
| F  | 0.933754  | 3.675664 | 13.945231 |
| F  | 1.746724  | 6.193936 | 14.370344 |
| F  | 1.004667  | 8.187260 | 12.664027 |
| F  | -0.566861 | 7.610684 | 10.513228 |
| F  | -1.379603 | 5.098145 | 10.063630 |

## References

1. S. Stoll and A. Schweiger, *J. Magn. Reson.*, 2006, **178**, 42–55
2. A. Sundararaman and F. Jäkle, *J. Organomet. Chem.*, 2003, **681**, 134–142.
3. P. Bissinger, H. Braunschweig, A. Damme, I. Krummenacher, A. K. Phukan K. Radacki and S. Sugawara, *Angew. Chem. Int. Ed.*, 2014, **53**, 7346–7363.
4. T. W. Hudnall, J. P. Moerdyk and C. W. Bielawski, *Chem. Commun.*, 2010, **46**, 4288–4290.
5. G. Sheldrick, SHELXT, *Acta Cryst.* 2015, **A71**, 3–8.
6. G. Sheldrick, *Acta Cryst.* 2008, **A64**, 112–122.
7. Gaussian 09, Revision E.01, M. J. Frisch, G. W. Trucks, H. B. Schlegel, G. E. Scuseria, M. A. Robb, J. R. Cheeseman, G. Scalmani, V. Barone, G. A. Petersson, H. Nakatsuji, X. Li, M. Caricato, A. Marenich, J. Bloino, B. G. Janesko, R. Gomperts, B. Mennucci, H. P. Hratchian, J. V. Ortiz, A. F. Izmaylov, J. L. Sonnenberg, D. Williams-Young, F. Ding, F. Lipparini, F. Egidi, J. Goings, B. Peng, A. Petrone, T. Henderson, D. Ranasinghe, V. G. Zakrzewski, J. Gao, N. Rega, G. Zheng, W. Liang, M. Hada, M. Ehara, K. Toyota, R. Fukuda, J. Hasegawa, M. Ishida, T. Nakajima, Y. Honda, O. Kitao, H. Nakai, T. Vreven, K. Throssell, J. A. Montgomery, Jr., J. E. Peralta, F. Ogliaro, M. Bearpark, J. J. Heyd, E. Brothers, K. N. Kudin, V. N. Staroverov, T. Keith, R. Kobayashi, J. Normand, K. Raghavachari, A. Rendell, J. C. Burant, S. S. Iyengar, J. Tomasi, M. Cossi, J. M. Millam, M. Klene, C. Adamo, R. Cammi, J. W. Ochterski, R. L. Martin, K. Morokuma, O. Farkas, J. B. Foresman, and D. J. Fox, Gaussian, Inc., Wallingford CT, 2015.
8. a) A. D. Becke, *J. Chem. Phys.*, 1993, **98**, 5648-5652; b) C. Lee, W. Yang and R. G. Parr, *Phys. Rev. B*, 1988, **37**, 785-789; c) S. H. Vosko, L. Wilk and M. Nusair, *Can. J. Phys.*, 1980, **58**, 1200-1211; d) P. J. Stephens, F. J. Devlin, C. F. Chabalowski and M. J. Frisch, *J. Phys. Chem.*, 1994, **98**, 11623-11627.
9. a) F. Weigend, *Phys. Chem. Chem. Phys.*, 2006, **8**, 1057–1065; b) F. Weigend, R. Ahlrichs, *Phys. Chem. Chem. Phys.*, 2005, **7**, 3297–3305.
